# Supplementary material for: Osteoporosis prevention among chronic glucocorticoid users: results from a public health insurance database
Source: PubMed Central journal article supplement — RMD Open. 2016 Jul 7;2(2):e000249. doi: 10.1136/rmdopen-2016-000249 (PMC4947732; doi:10.1136/rmdopen-2016-000249), 2016-07-07
Supplement: rmdopen-2016-000249supp_table.pdf [file rmdopen-2016-000249supp_table.pdf]

**Table 4: Prescription of calcium associated with vitamin D supplements and of osteoporosis medications according to initial glucocorticoid prescriber, underlying diagnosis, and whether dual-energy X-ray absorptiometry was performed.**

|                                          |                           | Overall population<br>n (%) | Women >55 years<br>n (%) |
|------------------------------------------|---------------------------|-----------------------------|--------------------------|
| <b>Calcium associated with vitamin D</b> |                           |                             |                          |
| Prescriber's speciality                  | Primary-care physician    | 1146 (14.6)*                | 704 (29.5)*              |
|                                          | Rheumatologist            | 257 (3.2)*                  | 162 (45.5)*              |
|                                          | Pulmonologist             | 36 (10.6)*                  | 22 (23.2)*               |
|                                          | Gastroenterologist        | 82 (36.8)*                  | 12 (42.9)*               |
|                                          | Internist                 | 38 (33.6)*                  | 15 (33.3)*               |
|                                          | Other                     | 203 (12.3)*                 | 101 (22.1)*              |
|                                          | Not recorded <sup>a</sup> | 780 (23.7)*                 | 520 (31.8)*              |
| DXA                                      | Yes                       | 546 (46.5)*                 | 400 (48.8)*              |
|                                          | No                        | 1996 (15.3)*                | 936 (26.3)*              |
| <b>Bisphosphonates</b>                   |                           |                             |                          |
| Prescriber's speciality                  | Primary-care physician    | 749 (9.5)*                  | 516 (21.6)*              |
|                                          | Rheumatologist            | 201 (27.5)*                 | 143 (40.2)*              |
|                                          | Pulmonologist             | 37 (10.9)*                  | 21 (22.1)*               |
|                                          | Gastroenterologist        | 14 (6.3)*                   | 5 (17.9)*                |
|                                          | Internist                 | 22 (19.5)*                  | 10 (22.2)*               |
|                                          | Other                     | 168 (10.2)*                 | 100 (21.9)*              |
|                                          | Not recorded <sup>a</sup> | 538 (16.4)*                 | 259 (25.7)*              |
| DXA                                      | Yes                       | 416 (35.4)*                 | 327 (39.9)*              |
|                                          | No                        | 1313 (10.1)*                | 727 (20.4)*              |
| <b>Any treatment<sup>c</sup></b>         |                           |                             |                          |
| Prescriber's speciality                  | Primary-care physician    | 2454 (31.2)*                | 1358 (36.8)*             |
|                                          | Rheumatologist            | 475 (63.1)*                 | 287 (80.6)*              |
|                                          | Pulmonologist             | 107 (31.5)*                 | 52 (54.7)*               |
|                                          | Gastroenterologist        | 109 (48.9)*                 | 20 (71.4)*               |
|                                          | Internist                 | 66 (38.4)*                  | 30 (66.7)*               |
|                                          | Other                     | 501 (30.4)*                 | 243 (53.2)*              |
|                                          | Not recorded <sup>a</sup> | 1425 (43.3)*                | 564 (56.1)*              |
| DXA                                      | Yes                       | 922 (78.5)*                 | 667 (81.3)*              |
|                                          | No                        | 4215 (32.3)*                | 1887 (33.1)*             |

<sup>a</sup>Specialty of hospital-based physicians was not recorded in the database.

<sup>b</sup>Defined in this study as systemic lupus erythematosus, Sjögren's syndrome, and polyarthritis nodosa.

<sup>c</sup>Supplemental calcium+vitamin D or any of the following osteoporosis medications: bisphosphonates, raloxifene, teriparatide, and strontium ranelate.

\*p<10<sup>-4</sup>, \*p<0.05, \*p NS
